# Supplementary material
Source: PubMed Central journal article supplement (PMC7213798)
Supplement: jciinsight-5-135703-s135.pdf [file jciinsight-5-135703-s135.pdf]

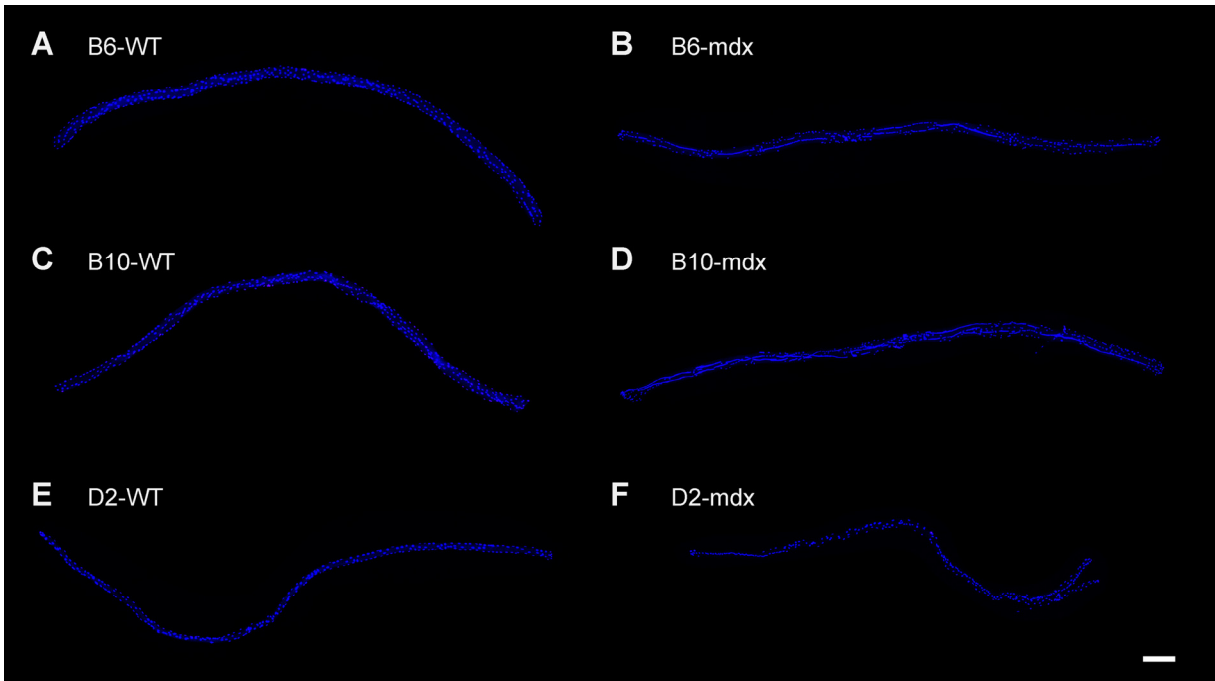

**G**

| Genotype, Age  | Genotype, Age  | Adjusted p-value |
|----------------|----------------|------------------|
| B6-WT, 4 wk    | B6-WT, 8 wk    | 0.004            |
| B6-WT, 8 wk    | B6-WT, 14 wk   | 0.0001           |
| B6-WT, 14 wk   | D2-WT, 14 wk   | 0.12             |
| B6-WT, 14 wk   | B10-WT, 14 wk  | 0.003            |
| B10-WT, 14 wk  | D2-WT, 14 wk   | 0.006            |
| B6-WT, 4 wk    | B6-mdx, 4 wk   | 0.001            |
| B6-WT, 8 wk    | B6-mdx, 8 wk   | 0.001            |
| B6-WT, 14 wk   | B6-mdx, 14 wk  | <0.0001          |
| B6-mdx, 4 wk   | B6-mdx, 8 wk   | 0.0006           |
| B6-mdx, 8 wk   | B6-mdx, 14 wk  | 0.004            |
| B6-mdx, 14 wk  | B10-mdx, 14 wk | 0.98             |
| B6-mdx, 14 wk  | D2-mdx, 14 wk  | 0.001            |
| B10-mdx, 14 wk | D2-mdx, 14 wk  | 0.0002           |
| B6-WT, 14 wk   | B6-mdx, 14 wk  | <0.0001          |
| B10-WT, 14 wk  | B10-mdx, 14 wk | <0.0001          |
| D2-WT, 14 wk   | D2-mdx, 14 wk  | <0.0001          |

**H**

| Genotype, Age  | Kolmogorov-Smirnov Normality Test |
|----------------|-----------------------------------|
| B6-WT, 4 wk    | Yes, $p>0.1000$                   |
| B6-WT, 8 wk    | No, $p=0.0262$                    |
| B6-WT, 14 wk   | Yes, $p>0.1000$                   |
| B6-mdx, 4 wk   | Yes, $p>0.1000$                   |
| B6-mdx, 8 wk   | Yes, $p>0.1000$                   |
| B6-mdx, 14 wk  | Yes, $p>0.1000$                   |
| B10-WT, 14 wk  | Yes, $p>0.1000$                   |
| B10-mdx, 14 wk | Yes, $p=0.0512$                   |
| D2-WT, 14 wk   | Yes, $p>0.1000$                   |
| D2-mdx, 14 wk  | Yes, $p>0.1000$                   |

**Supplemental Figure 1. Myonuclear incorporation in single EDL myofibers from B6-mdx, B10-mdx, and D2-mdx mice, and their corresponding genotype controls. (A to F)** DAPI nuclear staining of isolated, single EDL muscle fiber depicting nuclear density and fiber branching for 14-week-old B6-WT, B6-mdx, B10-WT, B10-mdx, D2-WT and D2-mdx strains. Scale bar, 200 $\mu$ m. **(G)** Statistical analysis using linear regression models clustered on mouse with Tukey post-hoc multiple comparison adjustment. **(H)** Assessment of data normality was calculated using the Kolmogorov-Smirnov normality test.

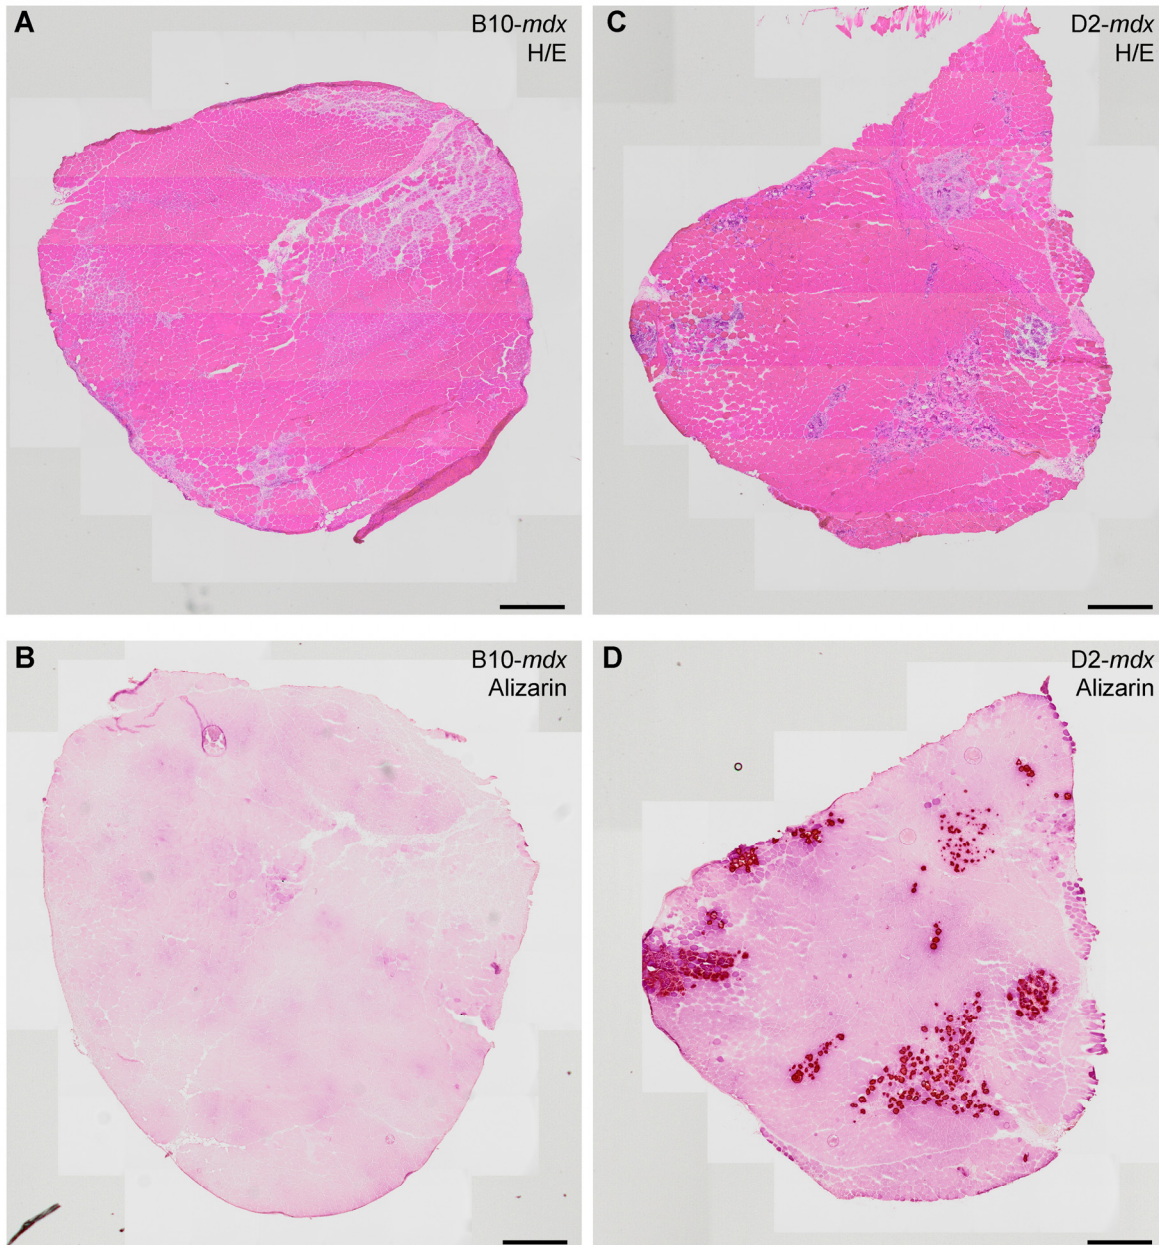

**Supplemental Figure 2. Histology of whole muscle sections showing widespread inflammation, degeneration, and calcification in muscles from D2-mdx mice. (A and C) H&E staining of triceps muscle sections from B10-mdx and D2-mdx mice, respectively, at 38d of age. (B and D) Alizarin red staining of triceps muscle sections from B10-mdx and D2-mdx mice, respectively, at 38d of age. Alternate images from those shown in main figures were chosen for whole cross-sectional representation in supplemental panels; upper and lower panels correspond to serial cross-sections. Scale bar, 500 $\mu$ m.**

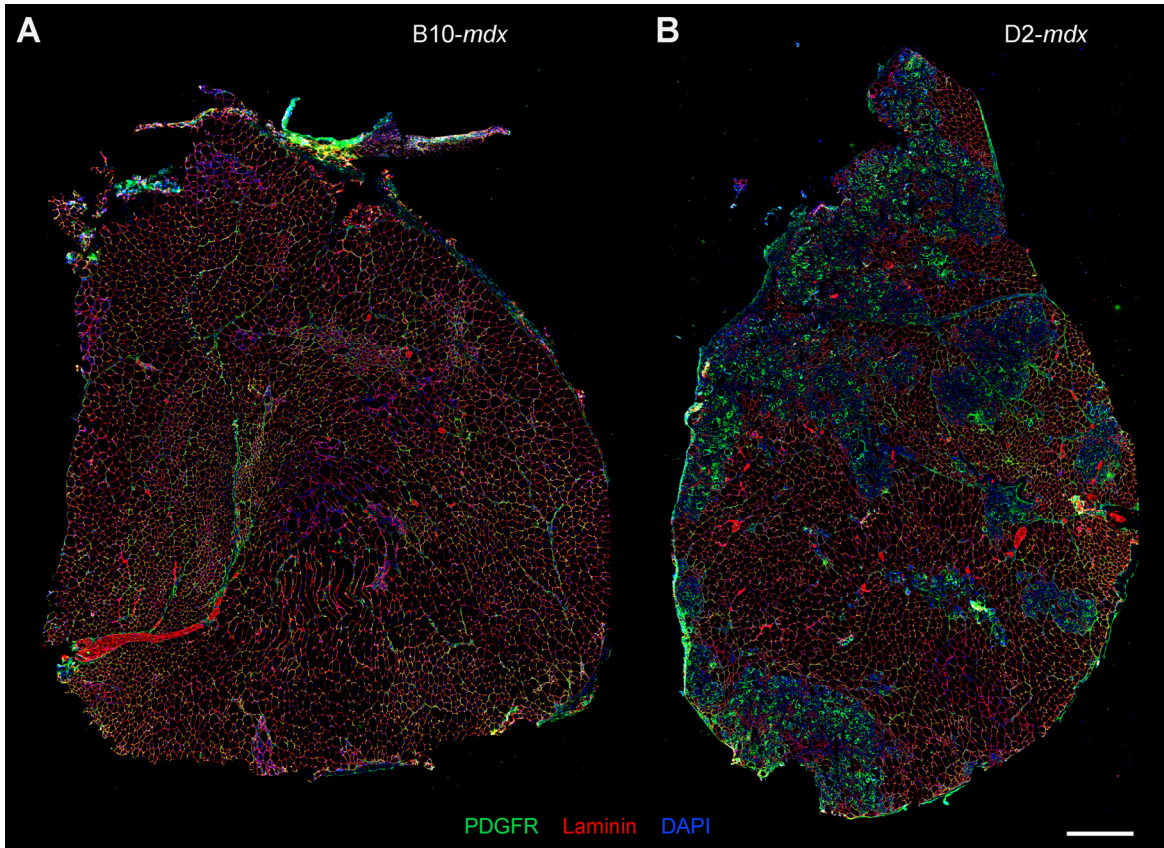

**Supplemental Figure 3. Increased expansion of PDGFR $\alpha$ <sup>+</sup> FAPs in response to spontaneous injury in D2-*mdx* muscle.** (A and B) Immunostaining for PDGFR $\alpha$ <sup>+</sup> cells in whole muscle cross-sections from triceps at 38 days of age in B10-*mdx* (A) and D2-*mdx* (B) mice. Note higher accumulation of PDGFR $\alpha$ <sup>+</sup> cells in muscles from D2-*mdx* mice showing increased presence of fibroadipogenic precursors (FAPs). Scale bar, 500 $\mu$ m.

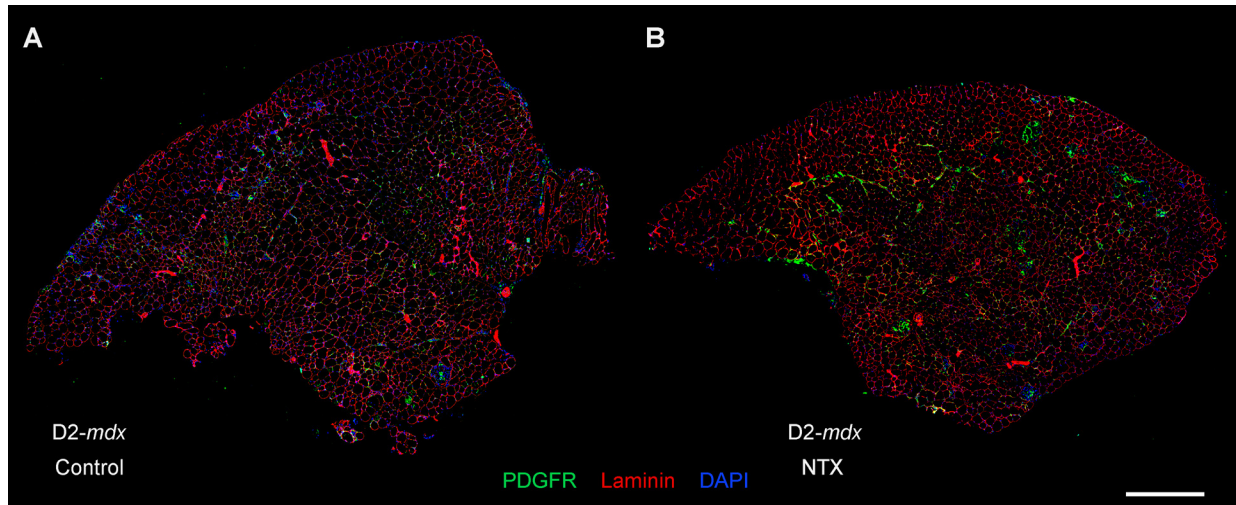

**Supplemental Figure 4. Increased expansion of PDGFR $\alpha$ <sup>+</sup> FAPs in response to notexin-induced injury in D2-*mdx* mice.** (**A** and **B**) Immunostaining for PDGFR $\alpha$ <sup>+</sup> cells in whole muscle cross-sections from TA of D2-*mdx* mice analyzed 14 days post NTX-injury; NTX administered at 24 days of age and mice were euthanized at 38 days of age (**B**). Uninjured, contralateral TA muscles (no NTX) were used as controls (**A**). Alternate images from those shown in main figures were chosen for whole cross-sectional representation in supplemental panels. Scale bar, 500 $\mu$ m.

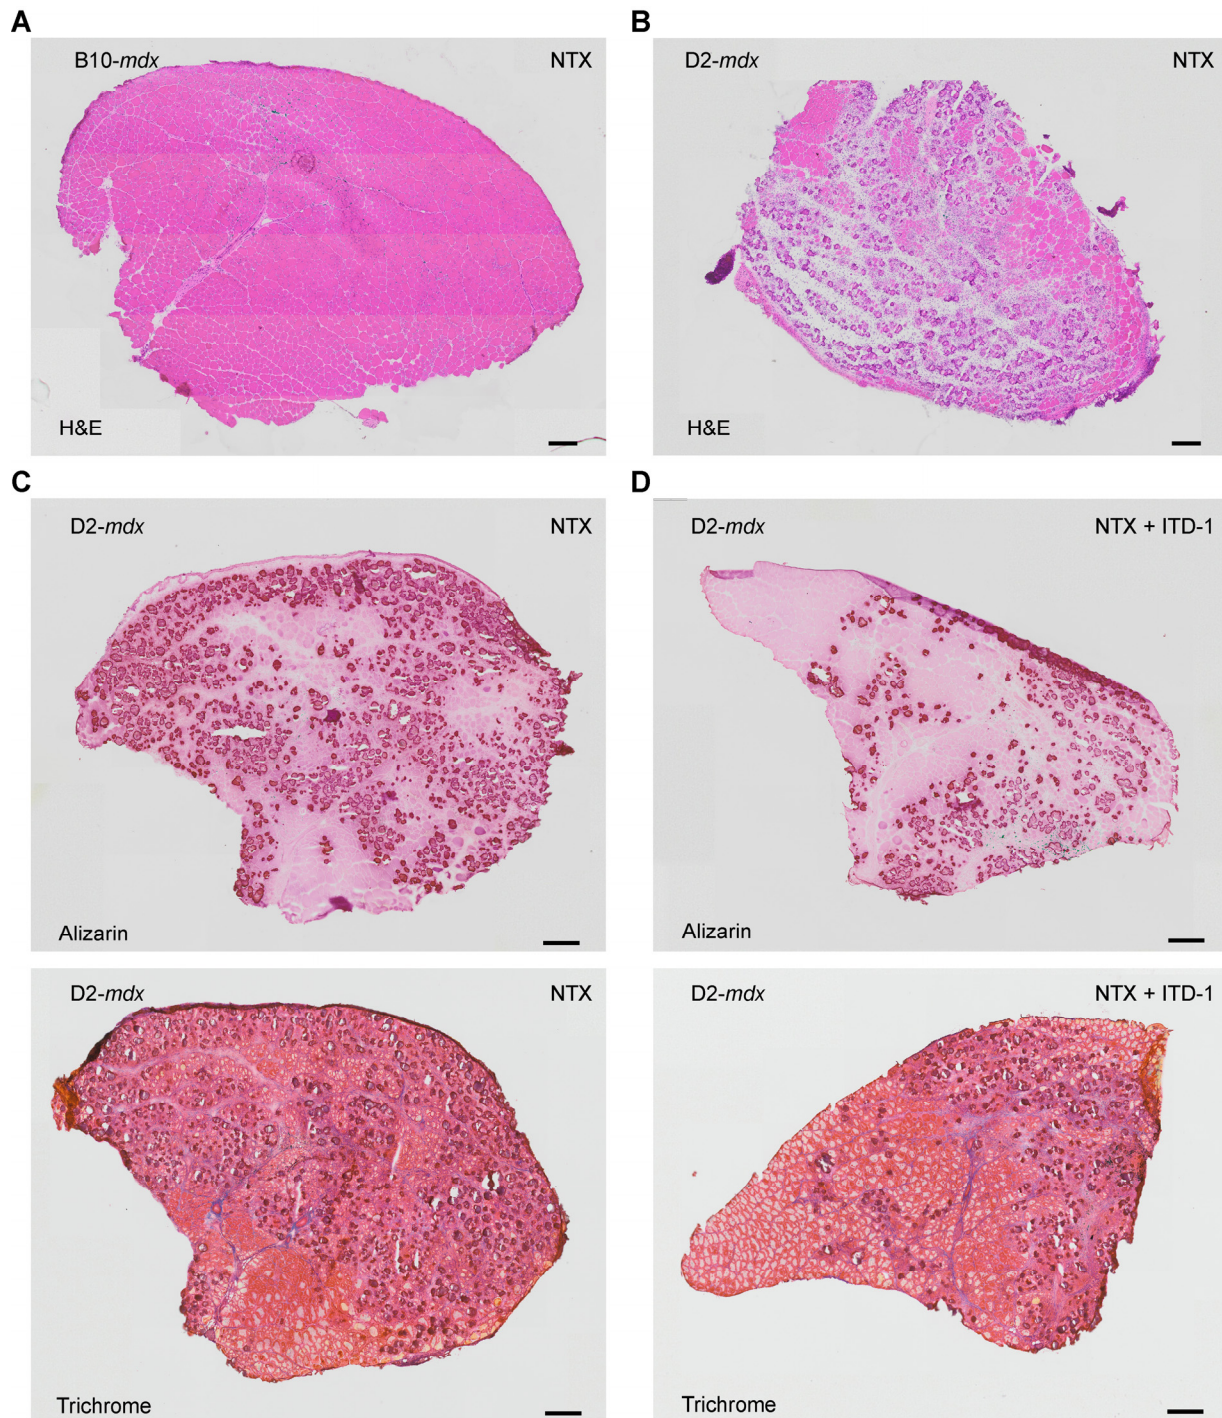

**Supplemental Figure 5. Histopathological analysis of fibro-calcification in dystrophic muscle after NTX injury and ITD-1 treatment.** (A and B) H&E staining of NTX-injured TAs from B10-*mdx* (A) and D2-*mdx* dissected 5 days post-injury (B). Tattoo dye (green). (C and D) Alizarin red and trichrome staining of corresponding TA muscle sections from D2-*mdx* mice after NTX injury with (D) or without (C) 3 intramuscular injections of ITD-1. Alternate images from those shown in main figures were chosen for whole cross-sectional representation in supplemental panels; upper and lower panels correspond to serial cross-sections. Scale bar, 200 $\mu$ m.
